# Supplementary material for: 2D- and 3D-cultures of human trabecular meshwork cells: A preliminary assessment of an in vitro model for glaucoma study
Source: PLOS journal article supplement (doi:10.1371/journal.pone.0221942), 2019-09-06

Myocilin expression in Trabecular Meshwork Cells was analyzed following dexamethasone treatment. After cells reach 70-80% confluency, HTMC cells were treated with 100nM and 500nM of dexamethasone for 6 days in DMEM with 1% FBS. Cell lysates were analyzed for Myocilin and beta-Actin expression by Western Blot.

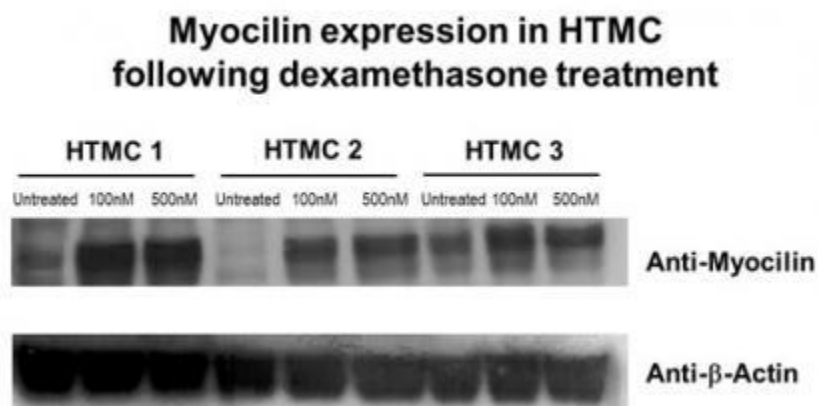

Supplement: S1 (10.1371/journal.pone.0221942.s001) [file journal.pone.0221942.s001]
